# Supplementary material for: A chemical switch enabled autonomous two-stage crosslinking polymeric binder for high performance silicon anodes
Source: Royal Society of Chemistry journal article supplement (doi:10.1039/d1ta07112b), 2021-12-06
Supplement: d1ta07112b1.pdf [file d1ta07112b1.pdf]

## Chemical Switch Enabled Autonomous Two Stage Crosslinking Polymeric Binder for High Performance Silicon Anodes

Zhangxing Shi<sup>1</sup>, Qian Liu<sup>1</sup>, Zhenzhen Yang,<sup>1</sup> Lily A. Robertson<sup>1,2</sup>, Sambasiva R Bheemireddy<sup>1,2</sup>,

Yuyue Zhao<sup>1,2</sup>, Zhengcheng Zhang<sup>1,2</sup>, and Lu Zhang<sup>1,2\*</sup>

<sup>1</sup>Chemical Sciences and Engineering Division, Argonne National Laboratory, 9700 South Cass Avenue, Lemont, IL 60439, United States

<sup>2</sup>Joint Center for Energy Storage Research, 9700 South Cass Avenue, Lemont, IL 60439, United States

\*Corresponding Author email: [luzhang@anl.gov](mailto:luzhang@anl.gov)

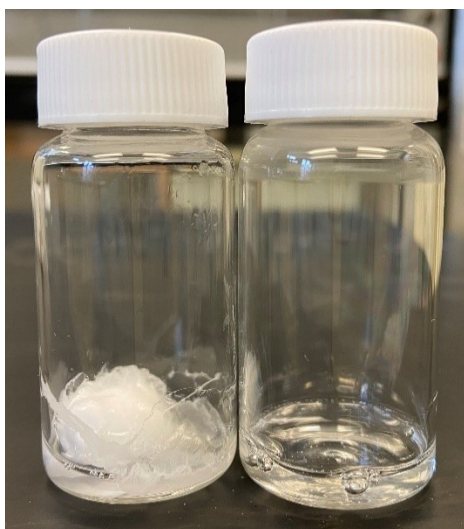

**Figure S1.** PAA and PEI form precipitates upon being mixed in water (left), clear solution is observed when PAA is neutralized by  $\text{NH}_4\text{OH}$  before PEI is added (PAA- $\text{NH}_3$ -PEI). (right).

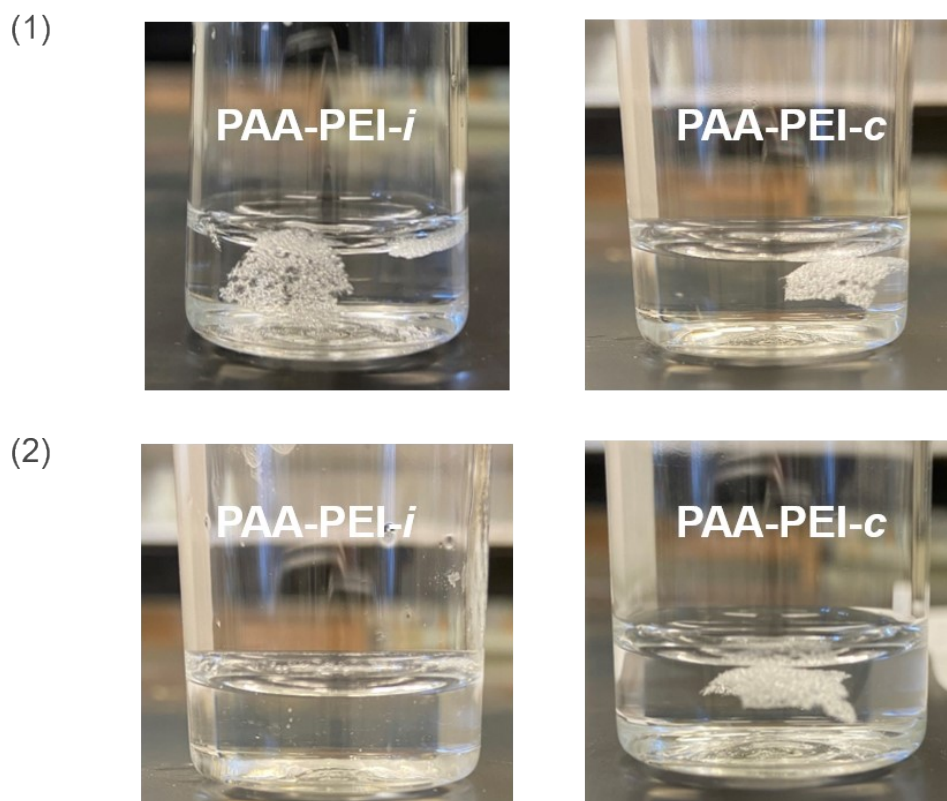

**Figure S2.** (1) PAA-PEI-*i* and PAA-PEI-*c* immersed in 1 M LiOH solution at the beginning of solubility test. (2) PAA-PEI-*i* after 10 min and PAA-PEI-*c* after one week.

**Table S1.** Loading, initial capacity, initial Coulombic efficiency, average Coulombic efficiency, and capacity retention of cells assembled with lithium metal/Si electrodes using PAA, PAA-PEI-*i*, or PAA-PEI-*c* binder.

| Electrode         | Loading [mg/cm <sup>2</sup> ] | Initial capacity <sup>a</sup> [mAh/g] | Initial Coulombic efficiency [%] | Average Coulombic efficiency <sup>b</sup> [%] | Capacity retention [%] |
|-------------------|-------------------------------|---------------------------------------|----------------------------------|-----------------------------------------------|------------------------|
| PAA               | 0.73                          | 2356                                  | 94.4                             | 98.9                                          | 10                     |
| PAA-PEI- <i>i</i> | 0.67                          | 2224                                  | 95.1                             | 98.0                                          | 25                     |
| PAA-PEI- <i>c</i> | 0.67                          | 2350                                  | 95.4                             | 99.3                                          | 77                     |

<sup>a</sup> Determined as the specific delithiation capacity at the first C/3 cycle

<sup>b</sup> Averaged value for the 150 cycles at C/3 rate

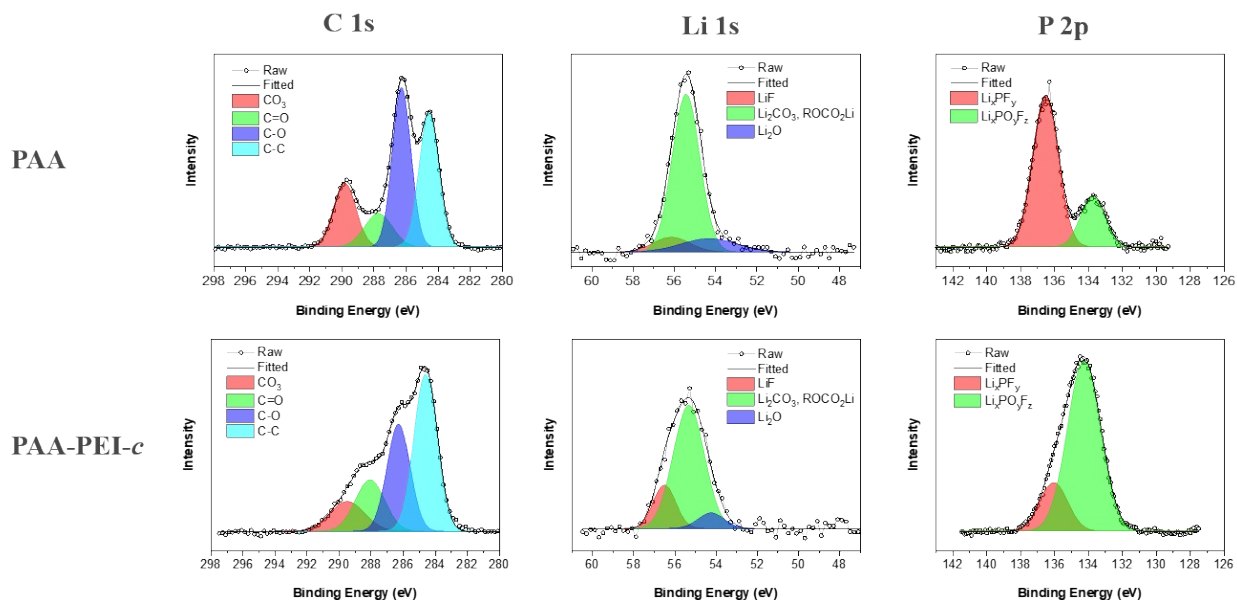

**Figure S3.** C 1s, Li 1s, and P 2p XPS spectra of PAA and PAA-PEI-*c* electrodes after 150 cycles.

**Table S2.** Loading of active materials, N/P ratio, initial capacity, initial Coulombic efficiency, and capacity retention results of cells assembled with NCM622/Si electrodes using PAA and PAA-PEI-*c* binder, respectively.

| Cell              | Loading (NCM622) [mg/cm <sup>2</sup> ] | Loading (Si) [mg/cm <sup>2</sup> ] | N/P ratio | Initial Capacity <sup>a</sup> [mAh/g] | Initial Coulombic Efficiency <sup>b</sup> [%] | Capacity Retention [%] |
|-------------------|----------------------------------------|------------------------------------|-----------|---------------------------------------|-----------------------------------------------|------------------------|
| PAA               | 9.5                                    | 1.01                               | 1.1       | 164                                   | 93.5                                          | 59                     |
| PAA-PEI- <i>c</i> | 9.5                                    | 0.95                               | 1.1       | 168                                   | 98.8                                          | 73                     |

<sup>a</sup> Determined as the specific delithiation capacity at the 3<sup>rd</sup> cycle of formation

<sup>b</sup> Determined at the first C/3 cycle

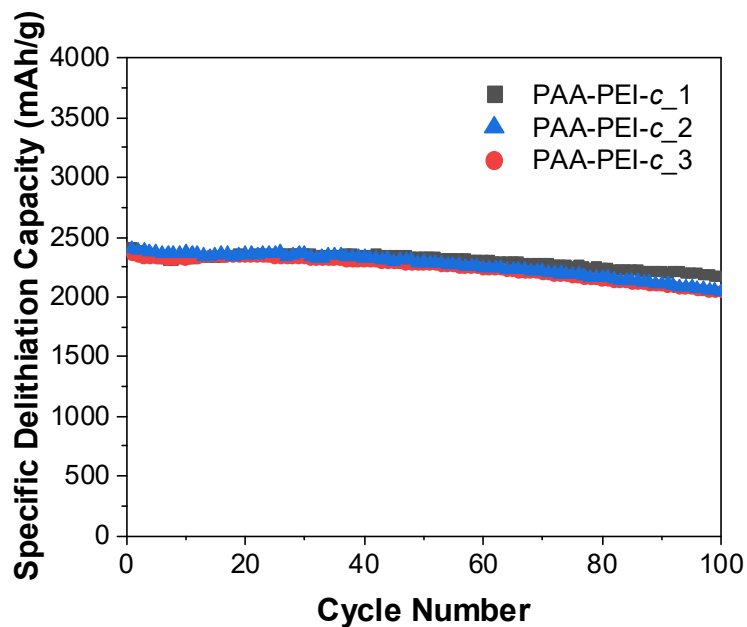

**Figure S4.** Cycling profiles of Li half-cells containing three batches of Si electrodes fabricated using PAA-PEI-*c* binder. The cells were subjected to three formation cycles between 0.01 V and 1.50 V at C/20 rate followed by 100 cycles at C/3 rate.
